# Supplementary material for: Electronic structure basis for enhanced overall water splitting photocatalysis with aluminum doped SrTiO3 in natural sunlight
Source: Royal Society of Chemistry journal article supplement (doi:10.1039/c9ee00310j), 2019-01-01
Supplement: c9ee00310j2.pdf [file c9ee00310j2.pdf]

## Supporting Information (6 pages)

### Electronic Structure Basis for Enhanced Overall Water Splitting Photocatalysis with Aluminum Doped SrTiO<sub>3</sub> in Natural Sunlight

Zeqiong Zhao,<sup>a</sup> Renato V. Goncalves,<sup>a,b</sup> Sajib K. Barman,<sup>c</sup> Emma J. Willard,<sup>a</sup> Edaan Byle,<sup>a</sup> Russell Perry,<sup>a</sup> Zongkai Wu,<sup>a</sup> Muhammad N. Huda,<sup>\*c</sup> Adam J. Moulé,<sup>d</sup> and Frank E. Osterloh<sup>\*a</sup>

<sup>a</sup> Department of Chemistry, University of California, Davis. One Shields Avenue, Davis, CA, 95616, USA. Fax: (+1) 530 752 8995; E-mail: fosterloh@ucdavis.edu

<sup>b</sup> São Carlos Institute of Physics, University of São Paulo, PO Box 369, 13560-970 São Carlos, SP, Brazil.

<sup>c</sup> Department of Physics, University of Texas at Arlington, Texas 76019, USA

<sup>d</sup> Department of Chemical Engineering, University of California, Davis. One Shields Avenue, Davis, CA, 95616, USA

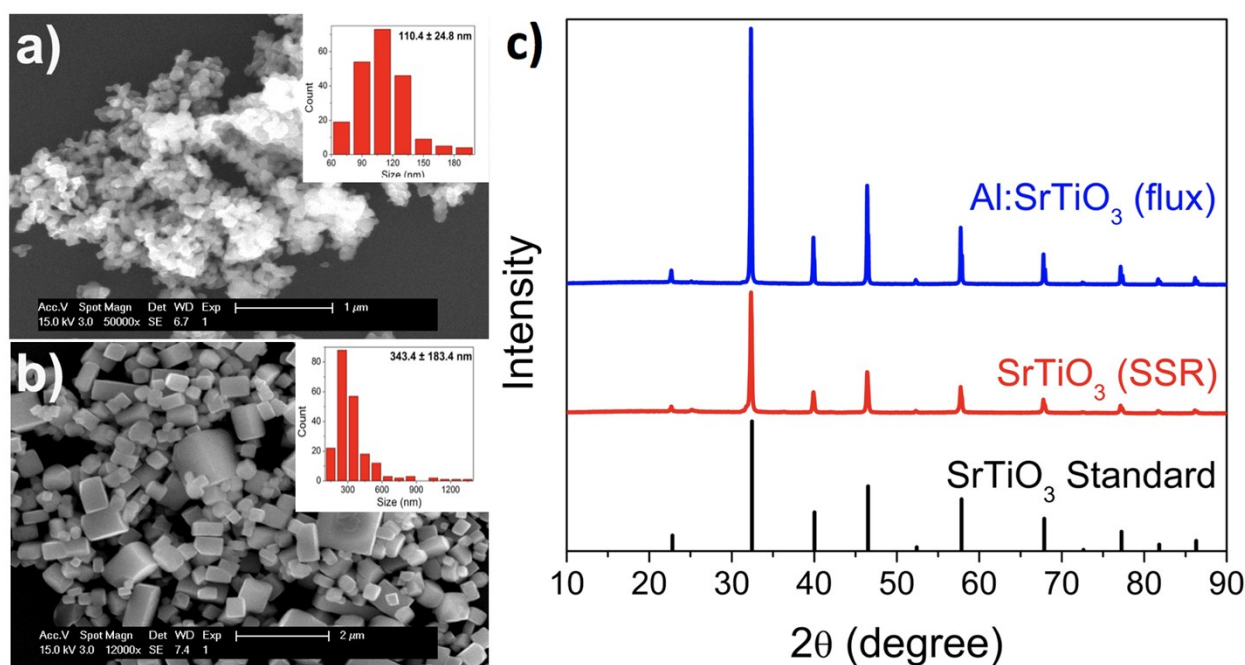

**Figure S1.** SEM image and size histogram of (a) SrTiO<sub>3</sub> and (b) Al:SrTiO<sub>3</sub>. (c) PXRD spectra of SrTiO<sub>3</sub> and Al:SrTiO<sub>3</sub>. The reference pattern for SrTiO<sub>3</sub> (JPDF #35-0734) is shown on the bottom. Adapted from Ref. 1 with permission from The Royal Society of Chemistry.

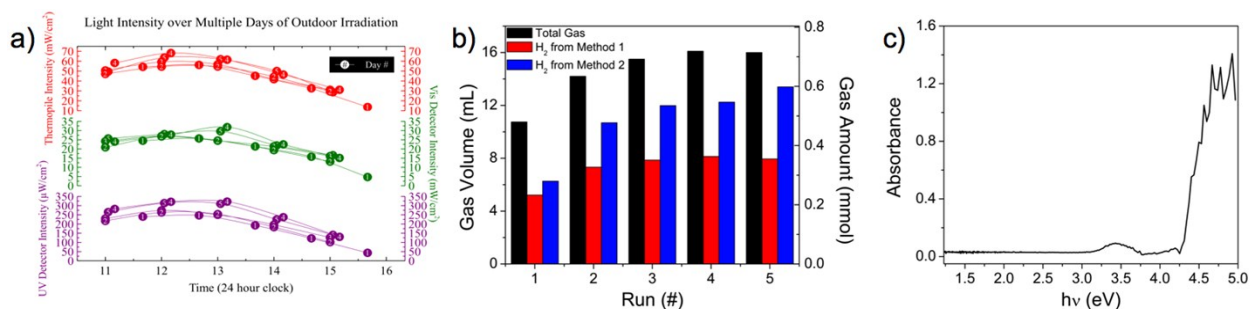

**Figure S2.** Supporting data for type 1 single bed particle suspension baggie reactor under natural sunlight. (a) Recorded light intensity for every hour with a UV detector (GaN detector, SED (SEL) 365 of 230 to 380 nm range), a thermopile detector (SED 623 of 200 - 4200 nm range), and a visible light detector (GaAsP detector, SED (SEL) 005 of 260-680 nm range) for 5 sunlight irradiation experiments. (b) Generated total gas amount and H<sub>2</sub> gas amount after 4 h sunlight irradiation. After the gas composition is determined by GC, H<sub>2</sub> amount from method 1 is based on the ratio of H<sub>2</sub> to total gas while H<sub>2</sub> amount from method 2 is based on the evolved O<sub>2</sub> to estimate the generated H<sub>2</sub> gas amount after 4 h irradiation. For method 2, O<sub>2</sub> from dissolved air is removed based on the amount of N<sub>2</sub>. (c) Absorption spectrum of polypropylene bag.

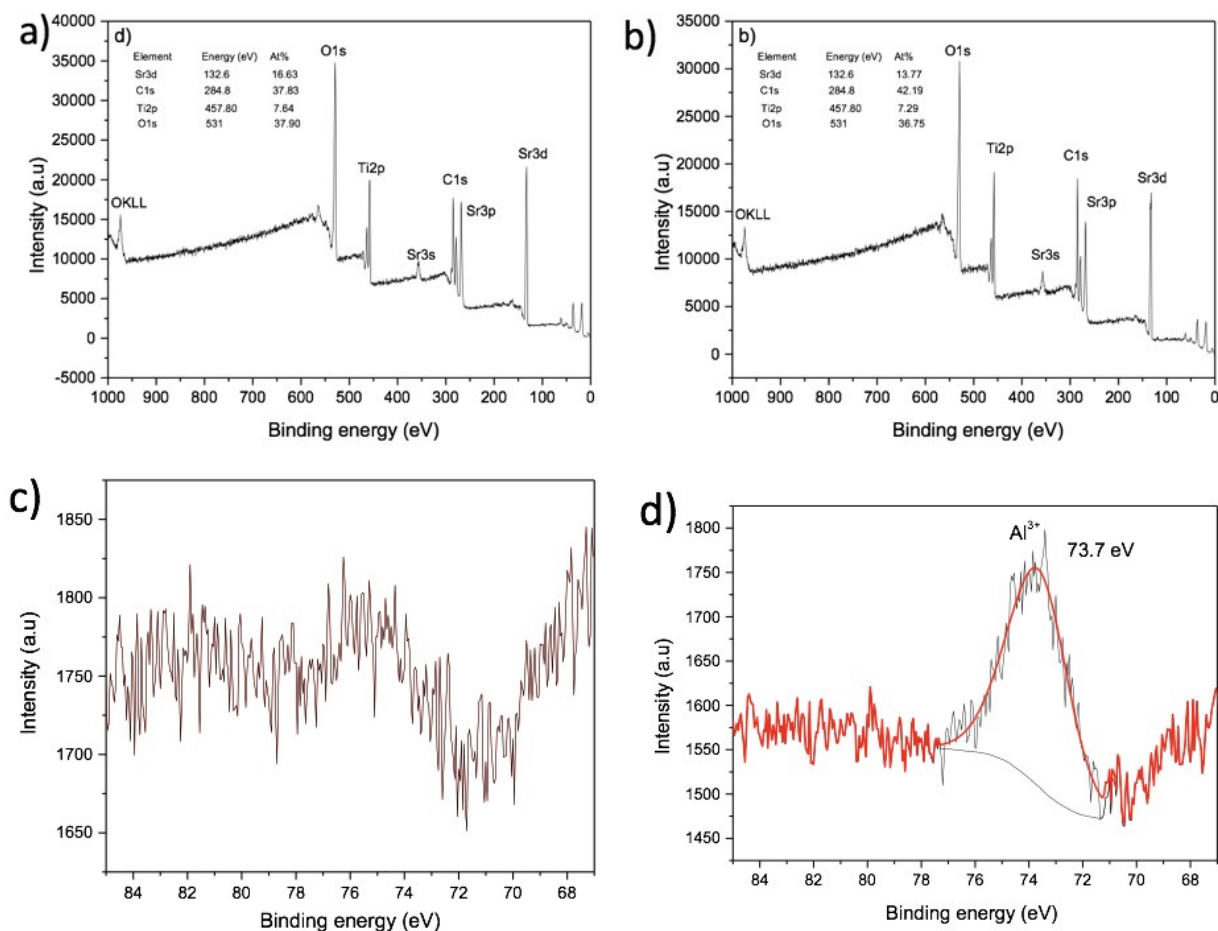

**Figure S3.** XPS survey spectra for (a) SrTiO<sub>3</sub> and (b) Al:SrTiO<sub>3</sub> and high resolution XPS spectra of Al 2p region in (c) SrTiO<sub>3</sub> and (d) Al:SrTiO<sub>3</sub>.

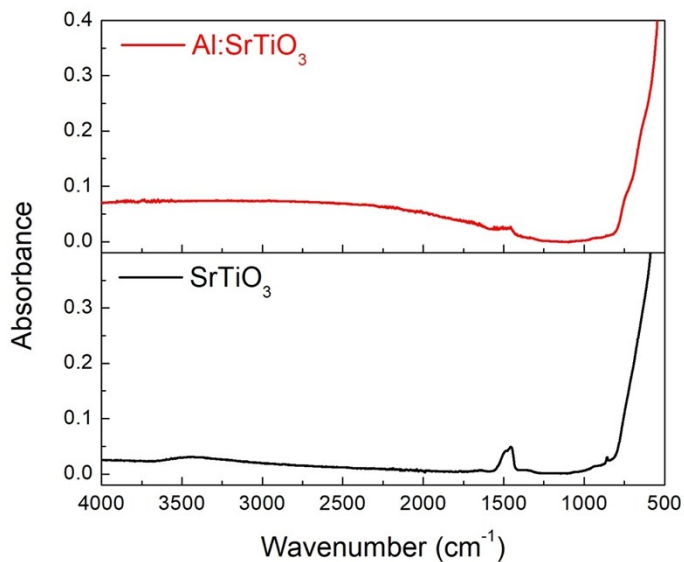

**Figure S4.** IR spectra of SrTiO<sub>3</sub> and Al:SrTiO<sub>3</sub>, showing the broad H-O-H stretching vibration at 3,500 cm<sup>-1</sup>.

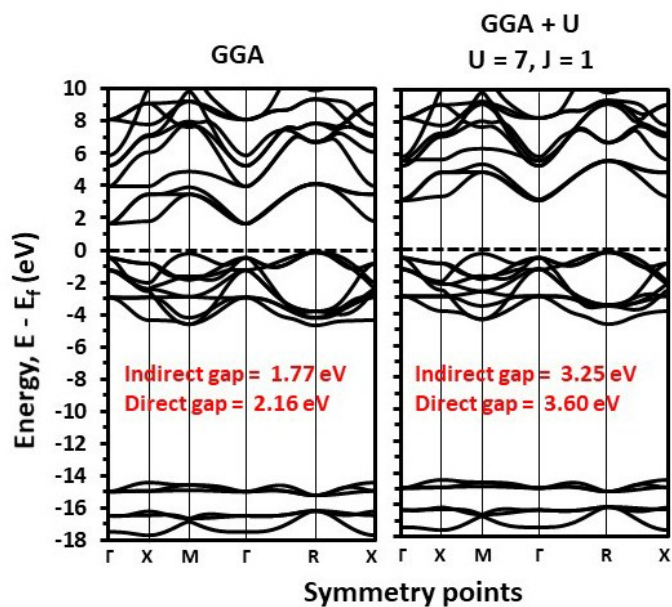

**Figure S5.** DFT calculated band structures of SrTiO<sub>3</sub> with no defect by GGA method and GGA+U method. The Fermi level ( $E_f$ ) is set at 0 eV.

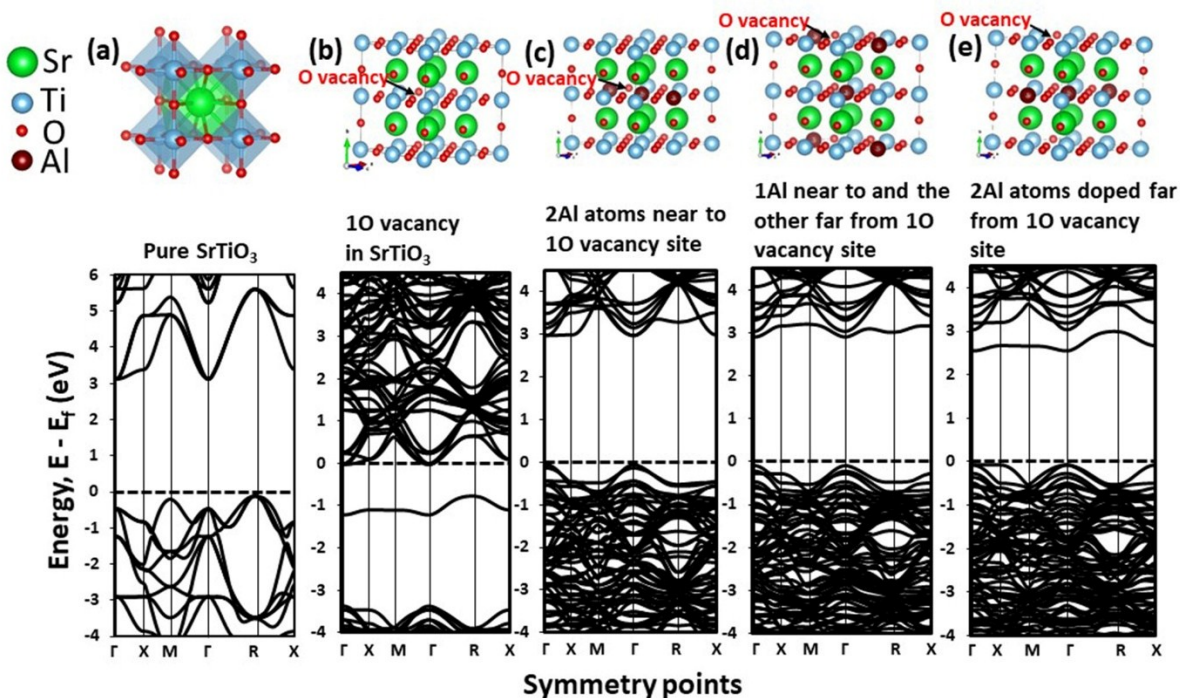

**Figure S6.** The DFT (GGA+U) electronic band structures of (a) STO with no defects, (b) STO with  $V_o$ , (c) 2 Al doped STO with  $V_o$  (2 Al close to  $V_o$ ); (d) 2 Al doped STO with  $V_o$  (1 Al close to  $V_o$  while 1 Al far from  $V_o$ ); (e) 2 Al doped STO with  $V_o$  (2 Al far away from  $V_o$ ). The Fermi level ( $E_f$ ) is set at 0 eV.

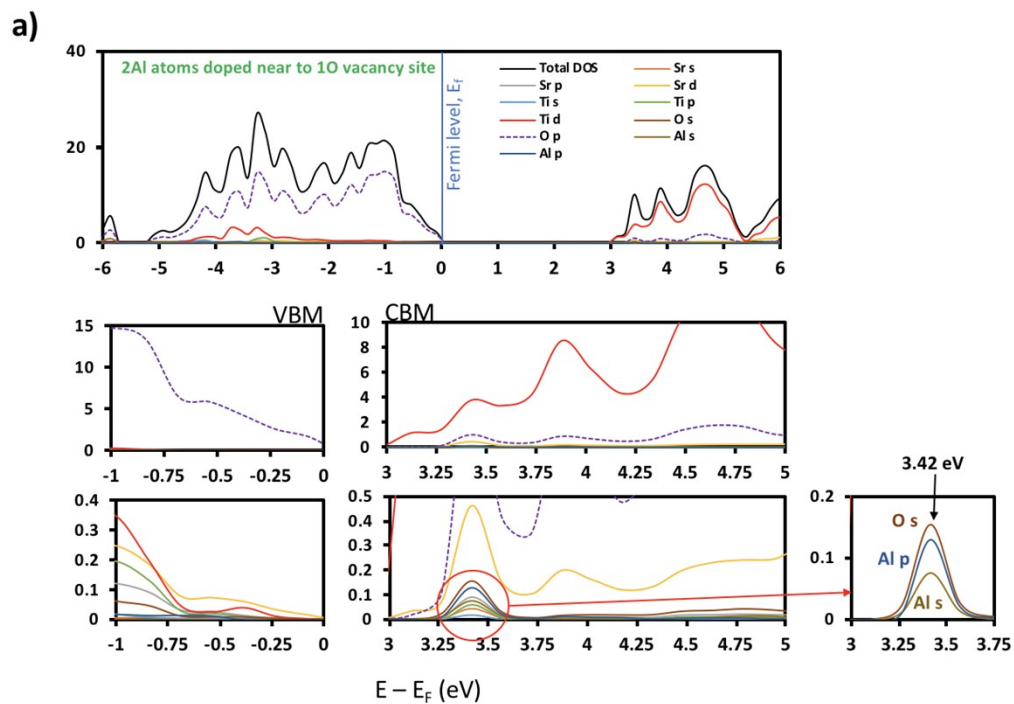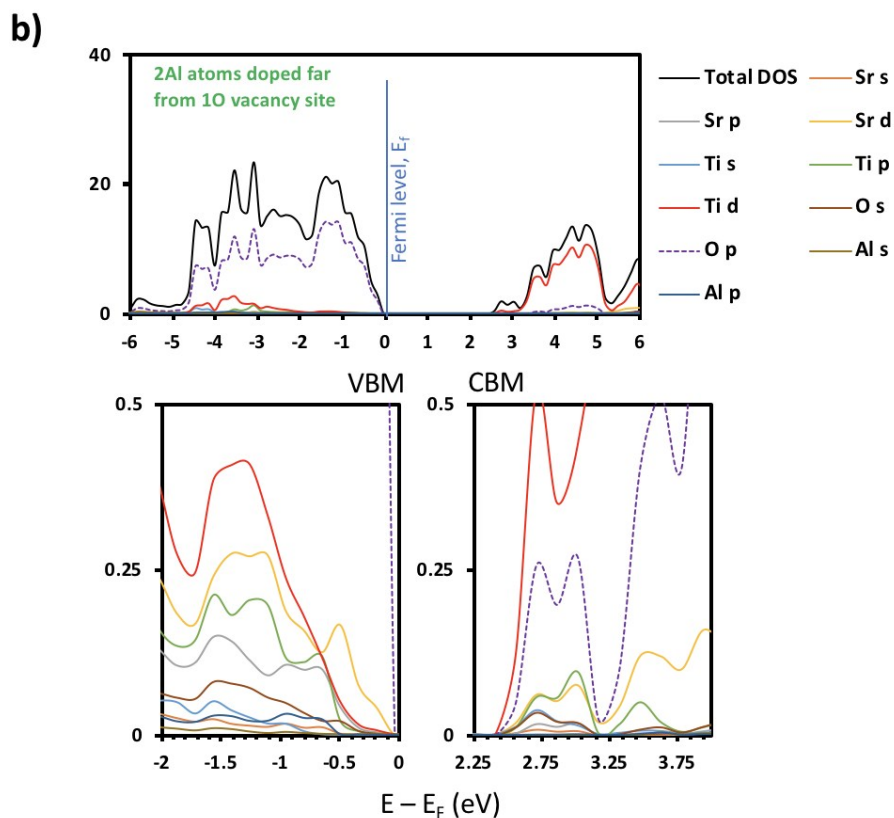

**Figure S7.** Magnified views of the Density of States plot for a) Al-doped SrTiO<sub>3</sub> (2 Al close to vacancy) and b) for Al-doped SrTiO<sub>3</sub> (2 Al far from vacancy).

**Table S1.** Summary of 5 experiments for sunlight irradiation and apparent quantum yield (AQY) and stability test of 0.1 wt% Rh, 0.1 wt% Cr, Rh<sub>2-y</sub>Cr<sub>y</sub>O<sub>3</sub> loaded Al:SrTiO<sub>3</sub>.

| Exp #                                                              | 1               | 2               | 3               | 4               | 5               | 6               | 7       |
|--------------------------------------------------------------------|-----------------|-----------------|-----------------|-----------------|-----------------|-----------------|---------|
| Light Source                                                       | sun             | sun             | sun             | sun             | sun             | 375 nm LED      | Xe arc  |
| Light intensity (mW cm <sup>-2</sup> ) /detector                   | 42 / thermopile | 48 / thermopile | 50 / thermopile | 55 / thermopile | 54 / thermopile | 42 / thermopile | 29 / UV |
| Area (cm <sup>2</sup> )                                            | 169.7           | 169.7           | 169.7           | 169.7           | 169.7           | 2.01            | 8.0     |
| Gas volume (mL)                                                    | 10.75           | 14.2            | 15.5            | 16.1            | 16              | -               | -       |
| H <sub>2</sub> evolution rate (mmol h <sup>-1</sup> ) <sup>a</sup> | 0.07            | 0.12            | 0.13            | 0.14            | 0.15            | 0.07            | 0.66    |
| STH (%) <sup>a</sup>                                               | 0.06            | 0.10            | 0.10            | 0.10            | 0.11            | -               | -       |
| AQY (%)                                                            | -               | -               | -               | -               | -               | 14.8%           | -       |

<sup>a</sup> The H<sub>2</sub> evolution rate and STH for sunlight irradiated system is obtained based on method 2 (see experimental details).

## References

1. Zhao, Z., E.J. Willard, H. Li, Z. Wu, R.H.R. Castro, and F.E. Osterloh, Aluminum enhances photochemical charge separation in strontium titanate nanocrystal photocatalysts for overall water splitting. *Journal of Materials Chemistry A*, **2018**. 6(33): p. 16170-16176.
